1                   **Associations Between Female Sex Hormones and Skeletal Muscle Ageing: The**  
2                                         **Baltimore Longitudinal Study of Ageing**

3

4 Annabel J. Critchlow<sup>a</sup>, Sarah E. Alexander<sup>b</sup>, Danielle Hiam<sup>a</sup>, Luigi Ferrucci<sup>d</sup>, David Scott<sup>a,c</sup>, Séverine  
5 Lamon<sup>a</sup>

6

7 <sup>a</sup>School of Exercise and Nutrition Sciences, Institute for Physical Activity and Nutrition (IPAN),  
8 Deakin University, Geelong, Australia.

9 <sup>b</sup>Cardiometabolic Health and Exercise Physiology, Baker Heart and Diabetes Institute, Melbourne,  
10 Australia

11 <sup>c</sup>School of Clinical Sciences at Monash Health, Monash University, Clayton, Australia.

12 <sup>d</sup>National Institute on Aging, National Institutes of Health, Baltimore, Maryland, United States

13

14

15 **Corresponding author:**

16 A/Prof. Séverine Lamon

17 School of Exercise and Nutrition Sciences, Faculty of Health

18 Deakin University, 221 Burwood Hwy, Burwood 3125.

19 Australia

20 Ph (+61 3) 9244 5571

21 Email: [severine.lamon@deakin.edu.au](mailto:severine.lamon@deakin.edu.au)

22

23 **Author contact details:**

24 Annabel Critchlow: [annabel.critchlow@deakin.edu.au](mailto:annabel.critchlow@deakin.edu.au)

25 Dr Sarah Alexander: [sarah.alexander@baker.edu.au](mailto:sarah.alexander@baker.edu.au)

26 Dr Danielle Hiam: [danielle.hiam@deakin.edu.au](mailto:danielle.hiam@deakin.edu.au)

27 Dr Luigi Ferruci: [ferruccilu@grc.nia.nih.gov](mailto:ferruccilu@grc.nia.nih.gov)

28 A/Prof David Scott: [d.scott@deakin.edu.au](mailto:d.scott@deakin.edu.au)

29

30 Word count: 4461

31 Number of figures: 1

32 Number of tables: 2

33 Number of references: 38

34 **Abstract**

35 **Background:** To date, most research investigating the influence of circulating sex hormones on  
36 ageing female skeletal muscle has been cross-sectional and focused only on dichotomised young and  
37 old, or pre- versus post-menopausal groups. This excludes an important transitional period from high  
38 to low circulating oestrogen. Using secondary data from the Baltimore Longitudinal Study of Aging,  
39 this study aimed to investigate cross-sectional and longitudinal associations between circulating sex  
40 hormones and skeletal muscle mass and function across a continuum of ages.

41 **Methods:** Multiple and binomial linear regression was used to map cross-sectional (n=319) and  
42 longitudinal (n=83) associations between circulating sex hormones (oestradiol (E2), free oestradiol  
43 index (FEI), free (TT) and bioavailable testosterone (BioT), testosterone/oestradiol ratio (T/E2)) and  
44 skeletal muscle mass and function in healthy females. Cross-sectional models analysed females across  
45 an ageing continuum (24-89 years) and longitudinal associations were tested across 4-6 years of  
46 ageing in females over 50 years old. Models were adjusted for age, height, physical activity,  
47 comorbidities, and ethnicity.

48 **Results:** Cross-sectionally, serum E2 and FEI were positively associated with relative appendicular  
49 lean mass (ALM;  $\beta=0.28$  and  $0.20$ , respectively,  $p<0.05$ ) and thigh muscle percentage ( $\beta=0.19$  and  
50  $0.15$ , respectively,  $p<0.05$ ). E2 and FEI were negatively associated with total body fat percentage ( $\beta=-$   
51  $0.30$  and  $-0.21$ , respectively,  $p<0.05$ ). BioT was positively associated with absolute ALM ( $\beta=0.13$ ,  
52  $p<0.05$ ) and total body fat percentage ( $\beta=0.18$ ,  $p<0.05$ ). TT was negatively associated with total body  
53 fat percentage ( $\beta=-0.14$ ,  $p<0.05$ ). The T/E2 ratio was negatively associated with thigh muscle CSA  
54 ( $\beta=-0.08$ ,  $p<0.05$ ) and hamstring strength ( $\beta=-0.12$ ,  $p<0.05$ ). Across 4-6 years,  $\Delta E2$  and  $\Delta FEI$  were  
55 positively associated with the change in ALM ( $\beta=0.29$  and  $0.42$ , respectively,  $p<0.05$ ), and  $\Delta FEI$  was  
56 positively associated with the change in handgrip strength ( $\beta=0.17$ ,  $p<0.05$ ).  $\Delta TT$  and  $\Delta BioT$  were  
57 negatively associated with the change in relative ALM ( $\beta=-0.25$  for both,  $p<0.05$ ) and relative  
58 quadriceps strength ( $\beta=-0.12$  and  $-0.27$ , respectively,  $p<0.05$ )

59 **Conclusion:** This study demonstrates novel associations between sex hormone levels and skeletal  
60 muscle in females across a wide continuum of ages. We also demonstrate that longitudinal  
61 fluctuations in circulating sex hormones must be considered to gain a comprehensive understanding of  
62 female muscle ageing.

63

64 **Keywords:** oestrogen, ovarian hormones, skeletal muscle, ageing

## 65 **Introduction**

66 The World Health Organization [1] predicts the global population above 60 years of age will double  
67 from 2019 to 2050. However, improvements to increase the lifespan have not been matched by  
68 advancements in the health span; that is, the length of time a person remains healthy, not just alive.  
69 While females live longer than males [2], those additional years are spent in significantly poorer  
70 health, highlighting a large disparity between the health span and lifespan in females compared to  
71 males [3].

72 Ageing is associated with a progressive loss of muscle mass and function which presents an  
73 increasingly substantial public health concern. Age-related muscle wasting is significantly associated  
74 with many adverse outcomes, including reduced independence and quality of life, and increased  
75 chronic disease, hospitalisation, and mortality [4]. While the prevalence of age-related muscle loss is  
76 seemingly similar between the sexes [5], evidence suggests that the patterns, and therefore the  
77 underlying molecular mechanisms of muscle ageing may be sex-specific. For example, females  
78 undergo a rapid decline in knee extensor strength ~20 years earlier than males [6]. In addition, while  
79 both sexes share the same direction of changes to the transcriptome with ageing, the magnitudes of  
80 change to differentially expressed genes differs between the sexes from young and old individuals [7].

81 Testosterone and oestrogen are the predominant sex hormones in males and females, respectively.  
82 While they are produced by both sexes, their profiles vary drastically across the lifespan. Females  
83 undergo a dramatic decline in endogenous oestrogen production starting ~40 years of age [8],  
84 meaning they can spend over a 3<sup>rd</sup> of their life in an oestrogen-deficient state. A steep reduction in  
85 total and bioavailable (i.e. not bound to sex hormone-binding globulin (SHBG)) testosterone occurs in  
86 the early reproductive years, which stabilises around menopause [9]. In contrast, male testosterone  
87 production remains largely consistent across adult life with a gradual decline in later decades [9].  
88 Oestrogen and testosterone elicit effects in multiple tissues, including skeletal muscle, by binding to  
89 the oestrogen (ER) and androgen receptor (AR), respectively [10]. In females, bioavailable  
90 testosterone is associated the maintenance of muscle mass [11], and oestrogen may regulate the  
91 maintenance of muscle mass, strength, and mitochondrial function [12].

92 A recent systematic review by our group found a consistent reduction in muscle mass and handgrip  
93 strength across the menopausal transition, however many studies show no association between  
94 oestradiol concentrations (E2, the major endogenous form of oestrogen) and muscle mass or function  
95 in pre- or postmenopausal females [13]. The cross-sectional nature and dichotomisation of age groups  
96 in this body of evidence is a limitation because it prevents conclusions to be drawn about the effects  
97 of changes in sex hormone concentrations on muscle health over time. Only one study has explored  
98 this association in a longitudinal manner, reporting no relationship between baseline circulating E2 or  
99 testosterone and the loss of appendicular lean mass or knee extensor strength over 3 years in

100 postmenopausal females [14]. However, it remains largely unknown how age-related fluctuations in  
101 sex hormones impact the regulation of skeletal muscle across a broader age range, as associations  
102 between the changes in sex hormones and skeletal muscle health across ageing and the menopausal  
103 transition are still to be mapped.

104 This study used data from the Baltimore Longitudinal Study of Aging (BLSA, [15]) to address two  
105 research questions. First, we aimed to determine the cross-sectional associations between circulating  
106 female sex hormone concentrations and skeletal muscle mass and function across a continuum of ages  
107 and hormonal status (24 to 89 years). Secondly, we aimed to investigate the longitudinal associations  
108 between circulating sex hormone concentrations and the changes in muscle mass and function that  
109 occurred over a 4–6-year period in females aged 50 to 87 years.

## 110 **Methods**

### 111 *Study Population*

112 This is a secondary analysis of data from the BLSA [15], an ongoing prospective study that aims to  
113 extensively map the process of healthy ageing [15]. Testing is carried out at the National Institute of  
114 Ageing Clinical Research Unit in Baltimore, Maryland. Healthy participants between 20-96 years  
115 without any chronic disease or cognitive impairment were recruited. Data collected between 2003 and  
116 2023 were utilised in this analysis. Participants under 60 years old were tested every 4 years, 60–79-  
117 year-olds were tested every 2 years, and those above 80 years were tested every year.

### 118 *Inclusion Criteria*

119 Inclusion criteria for the present study included female BLSA participants with no missing variables  
120 of interest (serum sex hormones, DXA body composition, handgrip, hamstring, and quadriceps  
121 strength, and confounding variables). Data from females at their first visit was used for the cross-  
122 sectional analysis if there were no missing variables (n=319). From these participants, females >50  
123 years were included in the longitudinal analysis (n=83) if they had a follow up visit 4-6 years later  
124 with all the required sex hormone and outcome variables. If they had multiple visits within this time  
125 frame, data from the latest was used. As the BLSA recruit only healthy individuals at baseline, there  
126 were no additional exclusion criteria specific to this study.

### 127 *Measures*

#### 128 *Serum Hormone Analysis*

129 Fasted (12 h) blood samples were taken from participants in the morning of each visit and  
130 immediately centrifuged at 4°C. Serum was aliquoted and stored at -80°C. Fasted serum hormone  
131 concentrations of E2 (ng/dL) and total testosterone (TT, ng/dL) were determined by high-performance  
132 liquid chromatography-tandem mass spectrometry (LC/MS; Esoterix part of LabCorp, Calabasas

133 Hills, CA). SHBG concentrations (nmol/L) were analysed via immunoradiometric assay (Esoterix part  
134 of LabCorp). To determine bioavailable testosterone (BioT, ng/dL), ammonium sulphate was used to  
135 separate SHBG-bound hormones from albumin-bound and free hormones (Esoterix part of LabCorp).  
136 E2, TT, and BioT concentrations were converted to SI units (pmol/L, nmol/L and nmol/L,  
137 respectively). The free oestrogen index (FEI) was calculated by dividing E2 (pmol/L) by SHBG  
138 (nmol/L) and multiplying by 100. The testosterone to oestrogen (T/E2) ratio was calculated by  
139 dividing TT (nmol/L) by E2 (pmol/L).

#### 140 *Body Composition*

141 Body composition measures including appendicular lean mass (ALM, kg), leg lean mass (LLM, kg),  
142 and total body fat mass (TBFM, kg) were assessed via whole-body DXA (Prodigy Scanner, GE,  
143 Madison, WI) scans with software version 10.51.006. The scanner was calibrated daily. Reliability has  
144 been assessed in 12 older (>65 years) males, showing <1% difference in fat mass (kg) between 2  
145 scans, 6 weeks apart [16]. Relative ALM ( $\text{kg}\cdot\text{kg}^{-1}$ ) was calculated by dividing appendicular lean mass  
146 (kg) by total body fat mass (kg). Thigh muscle cross-sectional area (CSA,  $\text{cm}^2$ ), subcutaneous fat area  
147 ( $\text{cm}^2$ ), intramuscular fat area ( $\text{cm}^2$ ), and muscle density (HU) were assessed using computerised  
148 tomography (CT) cross-sectional images of the mid-thigh (Somatom Sensation 10, Siemens, Malvern,  
149 PA). Thigh muscle percentage was calculated by dividing total thigh CSA ( $\text{cm}^2$ ) by muscle CSA  
150 ( $\text{cm}^2$ ). CT images were analysed and quantified with Geanie 2.1 software (BonAlyse Oy, Jyvaskla,  
151 Finland).

#### 152 *Muscle Function*

153 Handgrip strength (kg) was assessed using a Jamar Hydraulic hand dynamometer (Patterson Medical,  
154 Warrenville, IL). Participants sat with their arm extended to  $180^\circ$  or shoulder height and were  
155 instructed to squeeze the dynamometer as hard as possible. Maximum force was measured in three  
156 trials on each hand, and the best of 6 were used in the analysis. The average of the left and right hand  
157 was used in the analysis. Lower limb strength was measured using the Kin-Com isokinetic  
158 dynamometer (Kin-Com model 125E version 3.2, Chattanooga Group, Chattanooga, TN) from 2003  
159 to 2011, and the Biodex Multi-Joint System-Pro dynamometer (Biodex Medical System, Advantage  
160 Software V4.X, Inc., Shirley, NY) from 2011 to 2023. Quadriceps strength (isokinetic knee  
161 extension; Nm) and hamstring strength (isokinetic knee flexion; Nm) was measured at an angular  
162 velocity of  $30^\circ/\text{s}$  and  $180^\circ/\text{s}$ . Participants were asked to extend/flex their knee as hard as possible  
163 through a range of motion set between  $100\text{-}160^\circ$ . They completed two practice trials, followed by  
164 three test trials. The highest peak torque value was included in the analysis. Peak torque normalised to  
165 leg lean mass ( $\text{Nm}/\text{kg}$ ) and thigh muscle CSA ( $\text{Nm}/\text{cm}^2$ ), were calculated by dividing hamstring and  
166 quadriceps peak torque (Nm) by leg lean mass (kg) and thigh muscle CSA ( $\text{cm}^2$ ), respectively.

167 *Physical Function*

168 Gait speed was assessed by instructing participants to walk 400 m as fast as possible after a warm-up  
169 of 2.5 minutes at a usual gait speed. Chair stand ability was measured by asking participants to fold  
170 their arms and stand up from a chair 10 times. The pace of the first 5 chair stands (stands/s) was  
171 recorded. Participants completed three tests (6 m walk test, chair stand test, and standing balance) to  
172 comprise the Short Physical Performance Battery (SPPB), a validated assessment of mobility.  
173 Performance in each of the 3 tests was scored from 0 (worst) to 4 (best) and summed to give a total  
174 out of 12, as previously described [17]. Finally, participants were categorised as a faller if they had at  
175 least one self-reported fall in the previous 12 months.

176 *Potential confounding variables*

177 Demographic information was collected from participants via an interview, including age, ethnicity,  
178 comorbidities, and total physical activity in the previous two weeks. The age adjusted Charlson  
179 comorbidity index (ACCI) was determined as previously described [18]. Briefly, a score is assigned to  
180 each comorbid condition, with additional points for increasing age groups.

181 *Statistical Analysis*

182 Statistical analysis was completed using Stata software version 17.0 (StataCorp, College Station, TX).  
183 Data are presented as mean  $\pm$  SD and statistical significance was accepted as  $p < 0.05$ . Participants  
184 with values that were deemed physiologically implausible ( $>10$  SDs) were excluded. One participant  
185 was excluded from the cross-sectional analysis because handgrip strength was  $>300$ kg. Forty and 21  
186 participants were excluded from the cross-sectional and longitudinal analysis, respectively, because  
187 their hormone levels were below zero. Paired t-tests were performed to determine the differences  
188 between variables at baseline and follow-up.

189 *Multiple regression*

190 Multiple linear regression was performed to determine the cross-sectional relationships between  
191 circulating sex hormones, body composition (from DXA), and muscle function. Further outcome  
192 variables were assessed in subsets of participants where measured, including thigh CT measures and  
193 physical function. Additional models were performed to determine cross-sectional associations  
194 between self-reported menopausal and hormonal supplementation status and all muscle outcomes. In  
195 the longitudinal analysis, multiple regression models were performed to determine the relationship  
196 between the change in sex hormone levels and the change in outcome measures across 4-6 years in  
197 females over 50 years. Further analysis was completed to measure the longitudinal associations  
198 between baseline menopausal status and HRT use and the change in muscle outcome measures.

199 Each model was adjusted for age, ethnicity, height, ACCI, and physical activity. Where significant and  
200 opposing associations were detected for serum oestradiol (E2 or FEI) and testosterone (TT or BioT),

201 both hormones were added to the model to determine if they remained significantly and independently  
202 associated with the outcome variable.

203 Multicollinearity was assessed by variation inflation factors with a threshold of 5. No variables  
204 displayed collinearity. Normality of residuals was confirmed by plotting a histogram of studentised  
205 residuals. Homoscedasticity was assessed by plotting fitted versus predicted residuals. Some  
206 heteroscedasticity was observed, so robust standard errors were used. To determine the magnitude of  
207 the relationships, the z-score was calculated for all independent (E2, FEI, TT, BioT, SHBG, and T/E2  
208 ratio) and outcome measures (body composition, muscle function, and physical function), where zero  
209 equals the mean, and 1 equals the standard deviation. Where the standardised coefficient was  $<0.2$ , the  
210 effect size of the relationship was considered ‘small’, 0.2 to 0.5 denotes a ‘medium’ effect size, and  
211  $>0.5$  represents a ‘large’ effect size.

### 212 *Binomial linear regression*

213 In females over 50 years of age, binomial linear regression models were used to determine the cross-  
214 sectional relationship between sex hormone levels and dichotomous physical function outcome  
215 measures (mobility disability and fallers).

## 216 **Results**

### 217 *Participant characteristics*

218 Characteristics of the participants included in the cross-sectional and longitudinal analysis are shown  
219 in Supplementary Tables S1 and S2, respectively. Self-reported menopausal status and hormonal  
220 supplementation is shown in Table S3. In the longitudinal analysis, there was a 50.8% reduction  
221 ( $p<0.05$ ) from baseline (mean age:  $64.41 \pm 10.99$  years) to follow up ( $4.86 \pm 0.88$  years later) in  
222 circulating E2, but not in other hormones. In body composition measures, there was a 4.6% reduction  
223 in thigh muscle CSA ( $p<0.05$ ), and a 3.9% reduction in thigh muscle density ( $p<0.05$ ). Regarding  
224 muscle function, there was a reduction in absolute and relative hamstring strength at  $180^\circ/s$   
225 (absolute: -12%, relative to LLM: -11.2%, relative to muscle CSA: -8.4%,  $p<0.05$ ), and absolute and  
226 relative quadriceps strength at  $180^\circ/s$  (absolute: -8.0%, relative to LLM: -7.5%,  $p<0.05$ ) and  $30^\circ/s$   
227 (absolute: -8.2%, relative to LLM: -8.1%, relative to CSA: -4.5%,  $p<0.05$ ). There was a 9% increase  
228 in 400 m walk time ( $p<0.05$ ).

### 229 *Cross-sectional analysis*

230 Adjusted cross-sectional associations between circulating sex hormones and skeletal muscle outcome  
231 measures in females between 24-89 years are displayed in Table 1. Amongst the body composition  
232 measures, circulating E2 and FEI were positively associated with relative ALM (kg,  $p<0.05$ ). BioT  
233 was positively associated with absolute ALM (kg,  $p<0.05$ ) but negatively associated with relative

234 ALM (kg,  $p<0.05$ ). E2, FEI, and TT were negatively associated with total body fat percentage  
235 ( $p<0.05$ ), but there was a positive association for BioT ( $p<0.05$ ). E2 and FEI were positively  
236 associated with thigh muscle percentage ( $p<0.05$ ), and T/E2 ratio was negatively associated with  
237 thigh muscle CSA ( $\text{cm}^2$ ,  $p<0.05$ ). BioT was positively associated with subcutaneous and  
238 intramuscular fat (kg,  $p<0.05$ ), while E2 was negatively associated with subcutaneous fat (kg,  
239  $p<0.05$ ). In muscle function models, T/E2 ratio was negatively associated with hamstring peak torque  
240 (Nm) at  $180^\circ/\text{s}$  ( $p<0.05$ ) and BioT was positively associated with 400 m walk time (s,  $p<0.05$ ; Table  
241 1). The binomial linear regression results are displayed in Table S4. There were no significant  
242 associations between any hormones and indices of mobility disability or falls in females over 50 years  
243 ( $n=238$ ).

244 Cross-sectional associations between menopausal status, hormonal supplementation and muscle  
245 outcomes are displayed in Table S5. Postmenopausal status was positively associated with total body  
246 fat (%), subcutaneous fat (kg,  $p<0.05$ ), and intramuscular fat (kg,  $p<0.05$ ), and negatively  
247 associated with relative ALM (kg,  $p<0.05$ ) and thigh muscle CSA ( $\text{cm}^2$ ,  $p<0.05$ ). Amongst  
248 postmenopausal females, use of HRT was positively associated with handgrip strength (kg,  $p<0.05$ ).  
249 In premenopausal females, use of the HCP was positively associated with relative quadriceps strength  
250 normalised to leg lean mass at  $30^\circ/\text{s}$  (Nm/kg,  $p<0.05$ ). It was also negatively associated with muscle  
251 density (HU,  $p<0.05$ ), absolute and relative hamstring strength (Nm and Nm/kg,  $p<0.05$ ), and relative  
252 quadriceps strength normalised to thigh muscle CSA at  $30^\circ/\text{s}$  (Nm/ $\text{cm}^2$ ,  $p<0.05$ ).

253 Where E2/FEI and BioT were found to have opposite associations with a muscle outcome, both  
254 hormones were included in the model. BioT was added to the cross-sectional models investigating the  
255 relationship between E2 and relative ALM, total body fat percentage, and subcutaneous fat, and the  
256 relationship between FEI and relative ALM and total body fat. In all models, oestradiol (E2 or FEI)  
257 remained significantly associated positively with relative ALM and negatively with body fat  
258 percentage and subcutaneous fat, while BioT remained significantly associated in the opposite  
259 direction ( $p<0.05$ ; Table S6).

### 260 ***Longitudinal analysis***

261 Adjusted longitudinal associations between the change in circulating sex hormones and the change in  
262 skeletal muscle outcome measures in females over 50 years are displayed in Table 2. Regarding body  
263 composition,  $\Delta\text{E2}$  and  $\Delta\text{FEI}$  were positively associated with the change in ALM (kg,  $p<0.05$ ).  $\Delta\text{TT}$   
264 and  $\Delta\text{BioT}$  were negatively associated with the change in relative ALM (kg,  $p<0.05$ ).  $\Delta\text{FEI}$  was  
265 negatively associated with the change in thigh muscle percentage ( $p<0.05$ ), and positively associated  
266 with the change in subcutaneous and intramuscular fat (kg,  $p<0.05$ ). Regarding muscle function,  $\Delta\text{FEI}$   
267 was positively associated with the change in handgrip strength (kg,  $p<0.05$ ), but negatively associated  
268 with the change in quadriceps strength (Nm) at  $180^\circ/\text{s}$  ( $p<0.05$ ). Similarly,  $\Delta\text{TT}$  and  $\Delta\text{BioT}$  were



269 negatively associated with the change in relative quadriceps strength at 30°/s when normalised to leg  
 270 lean mass (Nm/kg,  $p < 0.05$ ). Finally,  $\Delta$ BioT was positively associated with the change in 400 m walk  
 271 time (s,  $p < 0.05$ ).

272 Longitudinal associations between baseline menopausal status, HRT use and the change in muscle  
 273 outcomes across 4-6 years in females over 50 years old are displayed in Table S7. Postmenopausal  
 274 status at baseline was positively associated with the change in ALM (kg,  $p < 0.05$ ) and thigh muscle  
 275 CSA (cm<sup>2</sup>,  $p < 0.05$ ). Being a current HRT user at baseline was negatively associated with the change  
 276 in handgrip strength (kg,  $p < 0.05$ ), while previous use of HRT was positively associated with the  
 277 change in intramuscular fat (kg,  $p < 0.05$ ) and relative hamstring strength normalised to muscle thigh  
 278 CSA (Nm/cm<sup>2</sup>,  $p < 0.05$ ), and negatively associated with the change in thigh muscle CSA (cm<sup>2</sup>,  
 279  $p < 0.05$ ).

## 280 Discussion

281 A summary of results is displayed in Figure 1. To the best of the authors knowledge, this is the first  
 282 study to 1) map cross-sectional associations between sex hormones and muscle outcomes in a wide  
 283 continuum of ages across the adult lifespan, and 2) investigate how changes to circulating sex  
 284 hormones beyond 50 years of age associate with changes to muscle mass and function over 4-6 years.

285

| <b>Outcome Variables</b> |                              | <b>E2</b> |   | <b>FEI</b> |   | <b>TT</b> |   | <b>BioT</b> |   | <b>T/E2</b> |   |
|--------------------------|------------------------------|-----------|---|------------|---|-----------|---|-------------|---|-------------|---|
|                          |                              | CS        | L | CS         | L | CS        | L | CS          | L | CS          | L |
| <b>Muscle mass</b>       | ALM                          |           | + |            | + |           |   | +           |   |             |   |
|                          | Relative ALM                 | +         |   | +          |   |           | - | -           | - |             |   |
|                          | Thigh muscle CSA             |           |   |            |   |           |   |             |   |             | - |
|                          | Thigh muscle %               | +         |   | +          | - |           |   |             |   |             |   |
| <b>Fat mass</b>          | Total body fat %             | -         |   | -          |   | -         |   | +           |   |             |   |
|                          | Subcutaneous fat             | -         |   |            | + |           |   | +           |   |             |   |
|                          | Intramuscular fat            |           |   |            | + |           |   | +           |   |             |   |
| <b>Muscle function</b>   | Handgrip strength            |           |   |            | + |           |   |             |   |             |   |
|                          | Hamstring strength           |           |   |            |   |           |   |             |   |             | - |
|                          | Quadriceps strength          |           |   |            | - |           |   |             |   |             |   |
|                          | Relative quadriceps strength |           |   |            |   |           | - |             | - |             |   |
|                          | 400m walk time               |           |   |            |   |           |   | +           | + |             |   |

**Figure 1.** Summary of cross-sectional and longitudinal associations between serum sex hormones and body composition and muscle function. The size of the symbol corresponds to the effect size of the association: small icons denote  $\beta < 0.2$ , medium icons denote  $\beta$  between 0.2 – 0.5. Green icons show positive associations, and red icons show negative associations. ALM: appendicular lean mass; BioT: bioavailable testosterone; CS: cross-sectional; E2: oestradiol; FEI: free oestrogen index; L: longitudinal; TT: total testosterone; T/E2: ratio of total testosterone to E2.

286

287 ***Sex hormones and body composition:***

288 *Oestradiol*

289 This study highlighted a positive cross-sectional association between serum E2 levels (total and FEI)  
290 and measures of muscle mass (relative ALM and thigh muscle percentage) in females across the  
291 lifespan, independent of age. Additionally, both total serum E2 and FEI were negatively associated  
292 with total body fat percentage and thigh subcutaneous fat, suggesting a potential role for E2 in  
293 maintaining the proportion of muscle mass throughout ageing. This is line with previous mechanistic  
294 work in animals highlighting an anabolic role of E2 in skeletal muscle [12]. Interestingly, this  
295 contradicts with many previous cross-sectional studies investigating samples of postmenopausal  
296 females, which demonstrate no associations between serum oestradiol or FEI and muscle mass [13].  
297 This is likely due to the inclusion of postmenopausal females that, by definition, have very low serum  
298 E2 concentrations, so there is unlikely to be large variation between participants. In contrast, the  
299 current cohort spans a wide continuum of adulthood (24 to 89 years) and E2 concentrations (5 to 1872  
300 pmol/L), thereby allowing us to understand how large age-related fluctuations in oestrogens impact  
301 the regulation of muscle mass over the lifespan.

302 In the longitudinal analysis of females over 50 years old, the change in serum E2 and FEI across the  
303 5-year follow up was positively associated with the change in absolute ALM, suggesting females with  
304 a larger decline in serum E2 and FEI have a greater decline in muscle mass. This further emphasises a  
305 potential role for total and free E2 in anabolic regulation, in line with the cross-sectional findings. The  
306 only longitudinal study to have previously investigated this found no association between serum E2  
307 and the loss of ALM over 3 years in 49 postmenopausal females [14]. However, baseline hormone  
308 concentrations were used in the model, as opposed to the change in hormone concentration from  
309 baseline to follow up. This suggests that it may not be baseline E2 concentration, but the magnitude of  
310 change in E2 concentration from baseline, that determines the extent of muscle loss post-menopause.  
311 It is therefore important to understand the temporal nature of the relationship between E2 and skeletal  
312 muscle, where the population is displaying rapid changes in both hormone concentrations and muscle  
313 mass and function.

314 Surprisingly, the change in serum FEI was negatively associated with the change in thigh muscle  
315 percentage, and positively associated with the change in thigh subcutaneous and intramuscular fat.  
316 Together this suggests that a decline in serum FEI coincides with an increased relative proportion of  
317 muscle in the thigh, potentially due to declines in both subcutaneous and intramuscular fat content,  
318 rather than an inverse relationship between FEI and muscle mass. We suggest this is the case, as the  
319 change in FEI was positively associated with absolute ALM. Although, DXA measures of ALM do

320 not appropriately distinguish muscle from intramuscular fat, which may have exaggerated this  
321 positive association, highlighting the importance of including direct measures of muscle and fat  
322 infiltration from CT scans.

### 323 *Testosterone*

324 In the cross-sectional analysis, serum TT concentrations were negatively associated with total body fat  
325 percentage and no other compositional measures. This in line with previous studies showing a lack of  
326 association between serum TT and lean mass or muscle CSA in both pre- [11] and postmenopausal  
327 [19-22] females, although this is the first study to investigate the association across the entire adult  
328 lifespan. Instead, bioavailable (non-SHBG bound) or free (non-protein bound) forms of testosterone  
329 appear to be more relevant in this context, as many studies have reported a positive association with  
330 lean mass [11, 19, 20, 22-25] or muscle CSA [26-28].

331 In line with these studies, BioT concentration was positively associated with absolute ALM. However,  
332 it was also positively associated with measures of fat mass (total body fat percentage, and thigh  
333 subcutaneous and intramuscular fat), explaining the negative association between BioT and relative  
334 ALM; an increase in fat tissue corresponds to a reduction in relative ALM, as relative ALM is indexed  
335 to total body fat mass. While change in muscle and fat mass across 4-6 years of ageing may occur in  
336 the same direction (i.e. both gained or lost), the resulting relative proportion of each tissue differs. A  
337 similar trend was noted in the longitudinal analysis, as both the change in TT and BioT from baseline  
338 to follow up were negatively associated with the change in relative ALM.

### 339 *Sex hormones and muscle function:*

#### 340 *Oestradiol*

341 No significant cross-sectional associations were present between serum E2 or FEI and any measure of  
342 muscle function. This contrasts with Pöllänen et al. [29] who found a positive association between  
343 serum E2 and relative quadriceps femoris strength in an albeit much smaller sample (n=25) of pre-  
344 and postmenopausal females. Importantly, age was not included as a confounding variable, therefore  
345 these findings may just reflect the loss of both serum E2 and muscle strength with age. Indeed, when  
346 age was included as a covariate, Bochud et al. [30] found no cross-sectional association between  
347 urinary E2 concentrations and handgrip strength in a sample of 366 females between 18 and 90 years  
348 of age.

349 The change in serum FEI was significantly and positively associated with the change in handgrip  
350 strength across 4-6 years, suggesting that a greater decline in free oestradiol is related to a greater  
351 decline in handgrip strength, a common proxy for overall muscle and physical function [31]. In  
352 contrast, the change in serum FEI was negatively associated with the change in absolute quadriceps

353 strength. This finding is unexpected but may indicate the presence of other confounding factors that  
354 are not yet identified. Rolland et al. [14] found no association between serum E2 and the loss of  
355 muscle strength over 3 years in postmenopausal females, but higher serum oestrone (E1) was  
356 similarly associated with a greater loss of muscle strength. E1 is an endogenous form of oestrogen  
357 which becomes predominant after the menopause-related decline of serum E2 [29]. While less potent  
358 than E2, its role within the muscle remains largely understudied, highlighting a target for future  
359 research, particularly in postmenopausal females.

### 360 *Testosterone*

361 Similarly to E2, both serum TT and BioT were not cross-sectionally associated with any measures of  
362 muscle strength. This is in line with other studies that investigated younger [11, 26], older [32] or both  
363 pre- and postmenopausal [29] females. To our knowledge, this is the first study to investigate  
364 longitudinal associations between serum testosterone and muscle function in ageing females. The  
365 change in both TT and BioT levels were negatively associated with the change in relative quadriceps  
366 strength, suggesting that an increase in serum testosterone concentration coincides with a decrease in  
367 lower limb strength. While this is unexpected, it is further supported by the positive cross-sectional  
368 and longitudinal associations between BioT and gait speed. This suggests that greater concentrations  
369 of, or changes to, circulating bioavailable testosterone associate with worse physical function in the  
370 lower limbs of ageing females. This is surprising as testosterone supplementation in postmenopausal  
371 females can elicit anabolic effects in skeletal muscle [33], although basal molecular regulation of  
372 muscle by testosterone has not yet been investigated in females.

### 373 *The T/E2 ratio and skeletal muscle ageing:*

374 When investigating their effects within skeletal muscle, circulating sex hormones have most often  
375 been considered individually, but their production is closely linked due to common biosynthetic  
376 pathways. For example, testosterone is converted to oestradiol via the enzyme aromatase; a process  
377 that can be quantitatively assessed by the T/E2 ratio, where a greater T/E2 ratio indicates less  
378 synthesis of E2 from testosterone, and therefore lower aromatase activity [34]. In premenopausal  
379 females, the ovaries are responsible for ~95% of circulating oestradiol production, but the peripheral  
380 conversion of testosterone to E2 becomes more physiologically relevant after menopause when the  
381 ovaries cease E2 production [34, 35]. We observed a negative cross-sectional association between the  
382 T/E2 ratio and muscle mass (thigh muscle CSA) and strength (hamstring peak torque), suggesting that  
383 a lower conversion rate of testosterone to E2 is concomitant to poorer muscle quality across ageing.  
384 Further research should be conducted to understand the contribution of varying oestrogen synthesis  
385 pathways in the regulation of skeletal muscle throughout ageing in females.

386 ***Limitations***

387 While this study provides novel insights into the relationship between circulating sex hormones and  
388 skeletal muscle ageing, it is not without limitations. Menstrual cycle phase has not been controlled  
389 when scheduling premenopausal participant visits. Common measures of acute skeletal muscle  
390 function are unlikely to be altered according to menstrual cycle phase [36], however, circulating E2  
391 levels can vary from 70-1500 pmol/L between the early follicular and ovulatory phase [37].  
392 Therefore, depending on the phase in which the blood sample was collected, the relationship between  
393 circulating E2 and skeletal muscle outcomes may significantly differ. Future studies should test all  
394 premenopausal participants within the early follicular phase as previously described [38], where  
395 serum E2 is at its lowest or 'basal' level.

396 Secondly, premenopausal participants provided information on HCP use, but many other forms of  
397 hormonal contraception are commonly used and provide external doses of oestrogen or progesterone,  
398 including the intrauterine devices, implant, injections and skin patches. Therefore, a more  
399 comprehensive understanding of exogenous sex hormone profiles is required to improve reliability of  
400 the findings.

401 Finally, approximately one third of participants in this study were non-white, suggesting that these  
402 findings are representative of a range of ethnicities. However, due to the inclusion criteria of the  
403 BLSA, participants are likely healthier than the general population. Therefore, the generalisability of  
404 these findings to females with multiple chronic health conditions is questionable.

405 ***Conclusion***

406 This study has demonstrated novel and divergent cross-sectional and longitudinal associations  
407 between circulating sex hormones and skeletal muscle outcomes in females across the ageing  
408 continuum. This emphasises the need to consider the temporal aspect of sex hormone regulation in  
409 ageing female muscle, particularly across the transitional period from a high to low state of circulating  
410 oestrogen. Future research should aim to identify molecular mechanisms of oestrogen action in human  
411 female skeletal muscle, to determine how ageing-induced oestrogen deficiency contributes to a loss of  
412 muscle mass and function in the later decades of life.

413 ***Additional Information***

414 ***Funding***

415 SL is funded by an Australian Research Council Future Fellowship (FT210100278). DS is funded by a  
416 National Health and Medical Research Council (NHMRC) Australia Investigator Grant  
417 (GNT1174886).

418 ***Ethical Standards***

419 Written informed consent was provided by all participants at every visit and the BSLA protocol was  
420 approved by the National Institute of Health (NCT00233272). This study (project number: 2023-029)  
421 has been declared exempt from ethical review on 07/02/2023 by the Deakin University Human  
422 Research Ethics Committee (DUHREC) as it comprises only of secondary data analysis. Supported in  
423 part by the Intramural Research Program of the National Institute on Aging, NIH. Baltimore, MD,  
424 USA

425 ***Conflicts of Interest***

426 The authors declare no conflicts of interest.

427

428

429

430

431

432

433

434

435

436

437

438

439

440

441

442

443 **References**

- 444 1. World Health Organization. Ageing and health. 2024. [https://www.who.int/news-room/fact-](https://www.who.int/news-room/fact-sheets/detail/ageing-and-health)  
445 [sheets/detail/ageing-and-health](https://www.who.int/news-room/fact-sheets/detail/ageing-and-health). Accessed 22/07/2024.
- 446 2. Australian Bureau of Statistics. Twenty years of population change. 2020.  
447 <https://www.abs.gov.au/articles/twenty-years-population-change>. Accessed 22/07/2024.
- 448 3. Austad SN, Fischer KE. Sex differences in lifespan. *Cell metabolism*. 2016;23:1022-33.
- 449 4. Peterson SJ, Braunschweig CA. Prevalence of Sarcopenia and Associated Outcomes in the  
450 Clinical Setting. *Nutrition in Clinical Practice*. 2016;31:40-8. doi:doi.org/10.1177/0884533615622537
- 451 5. Petermann-Rocha F, Balntzi V, Gray SR, Lara J, Ho FK, Pell JP, et al. Global prevalence of  
452 sarcopenia and severe sarcopenia: a systematic review and meta-analysis. *Journal of Cachexia,*  
453 *Sarcopenia and Muscle*. 2022;13:86-99. doi:doi.org/10.1002/jcsm.12783
- 454 6. Haynes EMK, Neubauer NA, Cornett KMD, O'Connor BP, Jones GR, Jakobi JM. Age and  
455 sex-related decline of muscle strength across the adult lifespan: a scoping review of aggregated data.  
456 *Appl Physiol Nutr Metab*. 2020;45:1185-96. doi:10.1139/apnm-2020-0081
- 457 7. de Jong J, Attema BJ, van der Hoek MD, Verschuren L, Caspers MPM, Kleemann R, et al.  
458 Sex differences in skeletal muscle-aging trajectory: same processes, but with a different ranking.  
459 *Geroscience*. 2023;45:2367-86. doi:10.1007/s11357-023-00750-4
- 460 8. Frederiksen H, Johannsen TH, Andersen SE, Albrethsen J, Landersoe SK, Petersen JH, et al.  
461 Sex-specific Estrogen Levels and Reference Intervals from Infancy to Late Adulthood Determined by  
462 LC-MS/MS. *J Clin Endocrinol Metab*. 2020;105:754-68. doi:10.1210/clinem/dgz196
- 463 9. Handelsman DJ, Sikaris K, Ly LP. Estimating age-specific trends in circulating testosterone  
464 and sex hormone-binding globulin in males and females across the lifespan. *Annals of Clinical*  
465 *Biochemistry*. 2016;53:377-84. doi:10.1177/0004563215610589
- 466 10. Alexander SE, Pollock AC, Lamon S. The effect of sex hormones on skeletal muscle  
467 adaptation in females. *European Journal of Sport Science*. 2022;22:1035-45.  
468 doi:10.1080/17461391.2021.1921854

- 469 11. Alexander SE, Abbott G, Aisbett B, Wadley GD, Hnatiuk JA, Lamon S. Total testosterone is  
470 not associated with lean mass or handgrip strength in pre-menopausal females. *Scientific Reports*.  
471 2021;11:10226. doi:10.1038/s41598-021-89232-1
- 472 12. Pellegrino A, Tiidus PM, Vandenoort R. Mechanisms of Estrogen Influence on Skeletal  
473 Muscle: Mass, Regeneration, and Mitochondrial Function. *Sports Med*. 2022;52:2853-69.  
474 doi:10.1007/s40279-022-01733-9
- 475 13. Critchlow AJ, Hiam D, Williams R, Scott D, Lamon S. The role of estrogen in female skeletal  
476 muscle aging: A systematic review. *Maturitas*. 2023;178:107844.  
477 doi:doi.org/10.1016/j.maturitas.2023.107844
- 478 14. Rolland YM, Perry HM, 3rd, Patrick P, Banks WA, Morley JE. Loss of appendicular muscle  
479 mass and loss of muscle strength in young postmenopausal women. *J Gerontol A Biol Sci Med Sci*.  
480 2007;62:330-5. doi:10.1093/gerona/62.3.330
- 481 15. Shock NW. Normal human aging: The Baltimore longitudinal study of aging. Washington  
482 D.C.: National Institute of Health; 1984.
- 483 16. Lindle RS, Metter EJ, Lynch NA, Fleg JL, Fozard JL, Tobin J, et al. Age and gender  
484 comparisons of muscle strength in 654 women and men aged 20–93 yr. *Journal of Applied*  
485 *Physiology*. 1997;83:1581-7. doi:10.1152/jappl.1997.83.5.1581
- 486 17. Guralnik JM, Simonsick EM, Ferrucci L, Glynn RJ, Berkman LF, Blazer DG, et al. A short  
487 physical performance battery assessing lower extremity function: association with self-reported  
488 disability and prediction of mortality and nursing home admission. *J Gerontol*. 1994;49:M85-94.  
489 doi:10.1093/geronj/49.2.m85
- 490 18. Zhou S, Zhang X-H, Zhang Y, Gong G, Yang X, Wan W-H. The Age-Adjusted Charlson  
491 Comorbidity Index Predicts Prognosis in Elderly Cancer Patients. *Cancer Management and Research*.  
492 2022;14:1683-91. doi:10.2147/CMAR.S361495
- 493 19. Gower BA, Nyman L. Associations among oral estrogen use, free testosterone concentration,  
494 and lean body mass among postmenopausal women. *J Clin Endocrinol Metab*. 2000;85:4476-80.  
495 doi:10.1210/jcem.85.12.7009



- 496 20. Bann D, Wu FC, Keevil B, Lashen H, Adams J, Hardy R, et al. Changes in testosterone  
497 related to body composition in late midlife: Findings from the 1946 British birth cohort study. *Obesity*  
498 (Silver Spring). 2015;23:1486-92. doi:10.1002/oby.21092
- 499 21. Sipilä S, Heikkinen E, Cheng S, Suominen H, Saari P, Kovanen V, et al. Endogenous  
500 Hormones, Muscle Strength, and Risk of Fall-Related Fractures in Older Women. *The Journals of*  
501 *Gerontology: Series A*. 2006;61:92-6. doi:10.1093/gerona/61.1.92
- 502 22. Rariy CM, Ratcliffe SJ, Weinstein R, Bhasin S, Blackman MR, Cauley JA, et al. Higher  
503 serum free testosterone concentration in older women is associated with greater bone mineral density,  
504 lean body mass, and total fat mass: the cardiovascular health study. *J Clin Endocrinol Metab*.  
505 2011;96:989-96. doi:10.1210/jc.2010-0926
- 506 23. Hwang AC, Liu LK, Lee WJ, Chen LY, Lin MH, Peng LN, et al. Association of androgen with  
507 skeletal muscle mass and muscle function among men and women aged 50 years and older in Taiwan:  
508 results from the I-Lan longitudinal aging study. *Rejuvenation Res*. 2013;16:453-9.  
509 doi:10.1089/rej.2013.1442
- 510 24. van Geel TA, Geusens PP, Winkens B, Sels JP, Dinant GJ. Measures of bioavailable serum  
511 testosterone and estradiol and their relationships with muscle mass, muscle strength and bone mineral  
512 density in postmenopausal women: a cross-sectional study. *Eur J Endocrinol*. 2009;160:681-7.  
513 doi:10.1530/eje-08-0702
- 514 25. Kong SH, Kim JH, Lee JH, Hong AR, Shin CS, Cho NH. Dehydroepiandrosterone Sulfate  
515 and Free Testosterone but not Estradiol are Related to Muscle Strength and Bone Microarchitecture in  
516 Older Adults. *Calcif Tissue Int*. 2019;105:285-93. doi:10.1007/s00223-019-00566-5
- 517 26. Häkkinen K, Pakarinen A, Kallinen M. Neuromuscular adaptations and serum hormones in  
518 women during short-term intensive strength training. *Eur J Appl Physiol Occup Physiol*. 1992;64:106-  
519 11. doi:10.1007/bf00717946
- 520 27. Häkkinen K, Pakarinen A, Kraemer WJ, Häkkinen A, Valkeinen H, Alen M. Selective muscle  
521 hypertrophy, changes in EMG and force, and serum hormones during strength training in older  
522 women. *J Appl Physiol (1985)*. 2001;91:569-80. doi:10.1152/jappl.2001.91.2.569

- 523 28. Yee ML, Hau R, Taylor A, Guerra M, Guerra P, Darzins P, et al. Sarcopenia in women with  
524 hip fracture: A comparison of hormonal biomarkers and their relationship to skeletal muscle mass and  
525 function. *Osteoporos Sarcopenia*. 2020;6:139-45. doi:10.1016/j.afos.2020.06.001
- 526 29. Pöllänen E, Sipilä S, Alen M, Ronkainen PH, Ankarberg-Lindgren C, Puolakka J, et al.  
527 Differential influence of peripheral and systemic sex steroids on skeletal muscle quality in pre- and  
528 postmenopausal women. *Aging Cell*. 2011;10:650-60. doi:10.1111/j.1474-9726.2011.00701.x
- 529 30. Bochud M, Ponte B, Pruijm M, Ackermann D, Guessous I, Ehret G, et al. Urinary Sex Steroid  
530 and Glucocorticoid Hormones Are Associated With Muscle Mass and Strength in Healthy Adults. *J*  
531 *Clin Endocrinol Metab*. 2019;104:2195-215. doi:10.1210/jc.2018-01942
- 532 31. Vaishya R, Misra A, Vaish A, Ursino N, D'Ambrosi R. Hand grip strength as a proposed new  
533 vital sign of health: a narrative review of evidences. *J Health Popul Nutr*. 2024;43:7.  
534 doi:10.1186/s41043-024-00500-y
- 535 32. Carcaillon L, Blanco C, Alonso-Bouzón C, Alfaro-Acha A, Garcia-García FJ, Rodriguez-  
536 Mañas L. Sex differences in the association between serum levels of testosterone and frailty in an  
537 elderly population: the Toledo Study for Healthy Aging. *PLoS One*. 2012;7:e32401.  
538 doi:10.1371/journal.pone.0032401
- 539 33. Huang G, Basaria S, Travison TG, Ho MH, Davda M, Mazer NA, et al. Testosterone dose-  
540 response relationships in hysterectomized women with or without oophorectomy: effects on sexual  
541 function, body composition, muscle performance and physical function in a randomized trial.  
542 *Menopause*. 2014;21:612-23. doi:10.1097/gme.000000000000093
- 543 34. Cui J, Shen Y, Li R. Estrogen synthesis and signaling pathways during aging: from periphery  
544 to brain. *Trends Mol Med*. 2013;19:197-209. doi:10.1016/j.molmed.2012.12.007
- 545 35. Vrtačnik P, Ostanek B, Mencej-Bedrač S, Marc J. The many faces of estrogen signaling.  
546 *Biochimica medica*. 2014;24:329-42.
- 547 36. Colenso-Semple LM, D'Souza AC, Elliott-Sale KJ, Phillips SM. Current evidence shows no  
548 influence of women's menstrual cycle phase on acute strength performance or adaptations to  
549 resistance exercise training. *Front Sports Act Living*. 2023;5:1054542.  
550 doi:10.3389/fspor.2023.1054542

551 37. Stricker R, Eberhart R, Chevailler M-C, Quinn F, Bischof P, Stricker R. Establishment of  
552 detailed reference values for luteinizing hormone, follicle stimulating hormone, estradiol, and  
553 progesterone during different phases of the menstrual cycle on the Abbott ARCHITECT® analyzer.  
554 Clinical chemistry and laboratory medicine : CCLM / FESCC. 2006;44:883-7.  
555 doi:10.1515/CCLM.2006.160

556 38. Elliott-Sale KJ, Minahan CL, de Jonge X, Ackerman KE, Sipilä S, Constantini NW, et al.  
557 Methodological Considerations for Studies in Sport and Exercise Science with Women as  
558 Participants: A Working Guide for Standards of Practice for Research on Women. Sports Med.  
559 2021;51:843-61. doi:10.1007/s40279-021-01435-8

560

561

562

563

564

565

566

567

568

569

570

571

572

573

574

575

**Table 1.** Adjusted cross-sectional associations between serum sex hormones and muscle outcomes.

| Outcome variable                                      | n                                                    | E2      |       |       | FEI             |       |      | TT              |       |      | BioT            |       |      | T/E Ratio       |       |      |             |
|-------------------------------------------------------|------------------------------------------------------|---------|-------|-------|-----------------|-------|------|-----------------|-------|------|-----------------|-------|------|-----------------|-------|------|-------------|
|                                                       |                                                      | $\beta$ | $R^2$ | P     | $\beta$         | $R^2$ | P    | $\beta$         | $R^2$ | P    | $\beta$         | $R^2$ | P    | $\beta$         | $R^2$ | P    |             |
| <b>Body composition</b>                               | ALM (kg)                                             | 319     | -0.02 | 0.32  | 0.72            | 0.07  | 0.33 | 0.13            | -0.01 | 0.32 | 0.84            | 0.13  | 0.34 | <b>0.03</b>     | -0.06 | 0.33 | 0.18        |
|                                                       | Relative appendicular lean mass (kg/kg total fat)    | 319     | 0.28  | 0.17  | <b>&lt;0.01</b> | 0.20  | 0.14 | <b>0.02</b>     | 0.11  | 0.12 | 0.06            | -0.17 | 0.14 | <b>0.01</b>     | 0.07  | 0.11 | 0.43        |
|                                                       | Total body fat (%)                                   | 319     | -0.30 | 0.15  | <b>&lt;0.01</b> | -0.21 | 0.11 | <b>&lt;0.01</b> | -0.14 | 0.10 | <b>&lt;0.01</b> | 0.18  | 0.11 | <b>&lt;0.01</b> | -0.10 | 0.09 | 0.15        |
|                                                       | Thigh muscle CSA (cm <sup>2</sup> )                  | 239     | -0.08 | 0.41  | 0.15            | 0.01  | 0.41 | 0.89            | -0.03 | 0.41 | 0.59            | 0.13  | 0.42 | 0.06            | -0.08 | 0.41 | <b>0.04</b> |
|                                                       | Thigh muscle (%)                                     | 239     | 0.19  | 0.23  | <b>&lt;0.01</b> | 0.15  | 0.21 | <b>0.03</b>     | 0.06  | 0.20 | 0.36            | -0.10 | 0.20 | 0.12            | 0.01  | 0.20 | 0.86        |
|                                                       | Muscle density (HU)                                  | 239     | -0.02 | 0.26  | 0.67            | -0.06 | 0.26 | 0.33            | -0.02 | 0.26 | 0.81            | -0.11 | 0.27 | 0.11            | 0.01  | 0.26 | 0.84        |
|                                                       | Subcutaneous fat (cm <sup>2</sup> )                  | 239     | -0.23 | 0.14  | <b>&lt;0.01</b> | -0.14 | 0.11 | 0.14            | -0.05 | 0.09 | 0.38            | 0.19  | 0.12 | <b>0.01</b>     | -0.07 | 0.10 | 0.21        |
|                                                       | Intramuscular fat (cm <sup>2</sup> )                 | 239     | -0.07 | 0.05  | 0.33            | 0.02  | 0.04 | 0.80            | 0.00  | 0.04 | 0.96            | 0.28  | 0.11 | <b>&lt;0.01</b> | -0.11 | 0.05 | 0.08        |
| <b>Muscle Function</b>                                | Handgrip strength (kg)                               | 319     | 0.02  | 0.42  | 0.80            | 0.04  | 0.43 | 0.41            | 0.02  | 0.42 | 0.69            | 0.05  | 0.43 | 0.30            | -0.04 | 0.43 | 0.17        |
|                                                       | Hamstring peak torque (Nm)                           |         |       |       |                 |       |      |                 |       |      |                 |       |      |                 |       |      |             |
|                                                       | 180d/s                                               | 319     | -0.03 | 0.33  | 0.55            | 0.05  | 0.33 | 0.41            | -0.02 | 0.33 | 0.63            | 0.03  | 0.33 | 0.58            | -0.12 | 0.34 | <b>0.02</b> |
|                                                       | 30d/s                                                | 319     | 0.02  | 0.35  | 0.74            | 0.09  | 0.36 | 0.07            | -0.02 | 0.35 | 0.64            | 0.03  | 0.35 | 0.55            | -0.05 | 0.36 | 0.17        |
|                                                       | Hamstring relative peak torque (Nm/kg LLM)           |         |       |       |                 |       |      |                 |       |      |                 |       |      |                 |       |      |             |
|                                                       | 180d/s                                               | 319     | -0.04 | 0.14  | 0.53            | -0.02 | 0.14 | 0.73            | -0.01 | 0.14 | 0.77            | -0.03 | 0.14 | 0.50            | -0.10 | 0.14 | 0.06        |
|                                                       | 30d/s                                                | 319     | 0.01  | 0.17  | 0.85            | 0.03  | 0.17 | 0.56            | -0.02 | 0.17 | 0.65            | -0.02 | 0.17 | 0.67            | -0.03 | 0.17 | 0.06        |
|                                                       | Hamstring relative peak torque (Nm/cm <sup>2</sup> ) |         |       |       |                 |       |      |                 |       |      |                 |       |      |                 |       |      |             |
|                                                       | 180d/s                                               | 319     | 0.06  | 0.10  | 0.33            | 0.02  | 0.10 | 0.77            | 0.00  | 0.10 | 0.98            | -0.11 | 0.11 | 0.09            | -0.08 | 0.11 | 0.06        |
|                                                       | 30d/s                                                | 319     | 0.06  | 0.10  | 0.28            | 0.05  | 0.10 | 0.48            | 0.02  | 0.10 | 0.73            | -0.11 | 0.11 | 0.10            | 0.03  | 0.10 | 0.06        |
|                                                       | Quadriceps peak torque (Nm)                          |         |       |       |                 |       |      |                 |       |      |                 |       |      |                 |       |      |             |
|                                                       | 180d/s                                               | 319     | -0.06 | 0.45  | 0.25            | -0.02 | 0.45 | 0.67            | 0.00  | 0.45 | 0.90            | 0.05  | 0.45 | 0.26            | 0.04  | 0.45 | 0.06        |
|                                                       | 30d/s                                                | 319     | -0.03 | -0.37 | 0.48            | 0.05  | 0.37 | 0.37            | -0.02 | 0.37 | 0.69            | 0.05  | 0.37 | 0.35            | 0.03  | 0.37 | 0.06        |
|                                                       | Quadriceps relative peak torque (Nm/kg LLM)          |         |       |       |                 |       |      |                 |       |      |                 |       |      |                 |       |      |             |
|                                                       | 180d/s                                               | 319     | -0.07 | 0.32  | 0.22            | -0.08 | 0.32 | 0.10            | 0.01  | 0.32 | 0.88            | 0.01  | 0.32 | 0.90            | 0.07  | 0.32 | 0.06        |
|                                                       | 30d/s                                                | 319     | -0.04 | 0.23  | 0.44            | -0.02 | 0.22 | 0.78            | -0.03 | 0.22 | 0.55            | -0.01 | 0.22 | 0.86            | 0.07  | 0.23 | 0.17        |
| Quadriceps relative peak torque (Nm/cm <sup>2</sup> ) |                                                      |         |       |       |                 |       |      |                 |       |      |                 |       |      |                 |       |      |             |
| 180d/s                                                | 239                                                  | -0.02   | 0.25  | 0.76  | -0.05           | 0.25  | 0.42 | 0.03            | 0.25  | 0.61 | -0.08           | 0.25  | 0.30 | 0.04            | 0.25  | 0.54 |             |
| 30d/s                                                 | 239                                                  | -0.03   | 0.16  | 0.72  | -0.01           | 0.16  | 0.89 | 0.03            | 0.16  | 0.54 | -0.08           | 0.17  | 0.26 | 0.11            | 0.17  | 0.11 |             |
| <b>Physical Function</b>                              | 400m walk time (s)                                   | 163     | -0.01 | 0.29  | 0.94            | 0.08  | 0.30 | 0.63            | 0.02  | 0.30 | 0.66            | 0.11  | 0.31 | <b>0.04</b>     | 0.06  | 0.30 | 0.62        |
|                                                       | 5 chair stand time (s)                               | 203     | 0.30  | 0.08  | 0.11            | 0.19  | 0.08 | 0.32            | -0.03 | 0.07 | 0.60            | 0.04  | 0.07 | 0.56            | -0.06 | 0.07 | 0.43        |

Multiple regression models were adjusted for age, ethnicity, height, ACCI, and total physical activity levels in the past two weeks. Physical function measures were only assessed in females  $\geq 50$  years old. ALM: appendicular lean mass; BioT: bioavailable testosterone; CSA: cross-sectional area; E2: oestradiol; FEI: free oestradiol index; HU: Hounsfield unit; LLM: leg lean mass; SHBG: sex hormone-binding globulin; TT: total testosterone; T/E2: ratio of total testosterone to oestradiol.

**Table 2.** Adjusted longitudinal associations between serum sex hormones and muscle outcomes across 4-6 years in females  $\geq 50$  years old.

| Outcome variable                                               | n                                                             | $\Delta E2$ |       |      | $\Delta FEI$ |       |      | $\Delta TT$     |       |      | $\Delta BioT$   |       |      | $\Delta T/E$ Ratio |       |      |      |
|----------------------------------------------------------------|---------------------------------------------------------------|-------------|-------|------|--------------|-------|------|-----------------|-------|------|-----------------|-------|------|--------------------|-------|------|------|
|                                                                |                                                               | $\beta$     | $R^2$ | P    | $\beta$      | $R^2$ | P    | $\beta$         | $R^2$ | P    | $\beta$         | $R^2$ | P    | $\beta$            | $R^2$ | P    |      |
| <b>Body composition</b>                                        | $\Delta$ ALM (kg)                                             | 83          | 0.29  | 0.17 | <b>0.03</b>  | 0.42  | 0.26 | <b>&lt;0.01</b> | -0.12 | 0.11 | 0.09            | -0.14 | 0.11 | 0.28               | -0.20 | 0.11 | 0.19 |
|                                                                | $\Delta$ Relative appendicular lean mass (kg/kg total fat)    | 83          | 0.08  | 0.08 | 0.30         | 0.08  | 0.08 | 0.21            | -0.25 | 0.15 | <b>&lt;0.01</b> | -0.25 | 0.13 | <b>&lt;0.01</b>    | 0.07  | 0.07 | 0.77 |
|                                                                | $\Delta$ Total body fat (%)                                   | 83          | -0.04 | 0.08 | 0.61         | -0.06 | 0.08 | 0.41            | 0.10  | 0.09 | 0.11            | 0.16  | 0.10 | 0.07               | -0.12 | 0.09 | 0.62 |
|                                                                | $\Delta$ Thigh muscle CSA (cm <sup>2</sup> )                  | 61          | 0.06  | 0.13 | 0.65         | 0.04  | 0.12 | 0.72            | 0.13  | 0.15 | 0.10            | 0.13  | 0.14 | 0.15               | 0.03  | 0.12 | 0.88 |
|                                                                | $\Delta$ Thigh muscle (%)                                     | 61          | -0.10 | 0.06 | 0.27         | -0.19 | 0.08 | <b>0.03</b>     | -0.03 | 0.05 | 0.58            | -0.01 | 0.05 | 0.94               | 0.04  | 0.05 | 0.87 |
|                                                                | $\Delta$ Muscle density (HU)                                  | 61          | -0.03 | 0.06 | 0.79         | -0.03 | 0.06 | 0.69            | -0.04 | 0.06 | 0.42            | 0.02  | 0.06 | 0.83               | 0.10  | 0.06 | 0.59 |
|                                                                | $\Delta$ Subcutaneous fat (cm <sup>2</sup> )                  | 61          | 0.17  | 0.14 | 0.12         | 0.28  | 0.17 | <b>0.01</b>     | 0.08  | 0.12 | 0.08            | 0.05  | 0.12 | 0.73               | -0.20 | 0.13 | 0.49 |
|                                                                | $\Delta$ Intramuscular fat (cm <sup>2</sup> )                 | 60          | 0.19  | 0.10 | 0.20         | 0.28  | 0.17 | <b>0.03</b>     | -0.02 | 0.06 | 0.69            | -0.02 | 0.06 | 0.83               | -0.08 | 0.06 | 0.71 |
| <b>Muscle Function</b>                                         | $\Delta$ Handgrip strength (kg)                               | 83          | 0.08  | 0.02 | 0.35         | 0.17  | 0.04 | <b>&lt;0.01</b> | 0.02  | 0.01 | 0.83            | 0.04  | 0.01 | 0.70               | -0.09 | 0.02 | 0.56 |
|                                                                | $\Delta$ Hamstring peak torque (Nm)                           |             |       |      |              |       |      |                 |       |      |                 |       |      |                    |       |      |      |
|                                                                | 180d/s                                                        | 83          | 0.09  | 0.07 | 0.48         | 0.07  | 0.07 | 0.69            | 0.01  | 0.06 | 0.92            | -0.04 | 0.07 | 0.77               | -0.02 | 0.06 | 0.91 |
|                                                                | 30d/s                                                         | 83          | 0.06  | 0.05 | 0.58         | 0.17  | 0.07 | 0.15            | -0.06 | 0.05 | 0.32            | -0.18 | 0.07 | 0.13               | -0.16 | 0.06 | 0.45 |
|                                                                | $\Delta$ Hamstring relative peak torque (Nm/kg LLM)           |             |       |      |              |       |      |                 |       |      |                 |       |      |                    |       |      |      |
|                                                                | 180d/s                                                        | 83          | -0.02 | 0.12 | 0.91         | -0.23 | 0.16 | 0.09            | 0.03  | 0.12 | 0.71            | 0.07  | 0.12 | 0.53               | 0.05  | 0.12 | 0.74 |
|                                                                | 30d/s                                                         | 83          | 0.05  | 0.03 | 0.66         | -0.04 | 0.03 | 0.71            | -0.01 | 0.02 | 0.93            | -0.02 | 0.02 | 0.88               | 0.00  | 0.02 | 0.98 |
|                                                                | $\Delta$ Hamstring relative peak torque (Nm/cm <sup>2</sup> ) |             |       |      |              |       |      |                 |       |      |                 |       |      |                    |       |      |      |
|                                                                | 180d/s                                                        |             | -0.04 | 0.11 | 0.75         | -0.12 | 0.12 | 0.47            | 0.02  | 0.10 | 0.80            | 0.00  | 0.10 | 0.97               | 0.07  | 0.11 | 0.71 |
|                                                                | 30d/s                                                         |             | -0.02 | 0.05 | 0.83         | 0.01  | 0.05 | 0.90            | -0.02 | 0.05 | 0.71            | -0.12 | 0.06 | 0.22               | -0.09 | 0.05 | 0.68 |
|                                                                | $\Delta$ Quadriceps peak torque (Nm)                          | 83          |       |      |              |       |      |                 |       |      |                 |       |      |                    |       |      |      |
|                                                                | 180d/s                                                        | 83          | -0.11 | 0.15 | 0.32         | -0.31 | 0.22 | <b>&lt;0.01</b> | 0.04  | 0.14 | 0.61            | 0.07  | 0.14 | 0.54               | 0.13  | 0.14 | 0.43 |
|                                                                | 30d/s                                                         |             | -0.07 | 0.04 | 0.60         | -0.18 | 0.06 | 0.15            | 0.00  | 0.03 | 0.97            | -0.01 | 0.03 | 0.96               | 0.09  | 0.04 | 0.63 |
|                                                                | $\Delta$ Quadriceps relative peak torque (Nm/kg LLM)          |             |       |      |              |       |      |                 |       |      |                 |       |      |                    |       |      |      |
|                                                                | 180d/s                                                        | 83          | 0.09  | 0.06 | 0.43         | 0.14  | 0.07 | 0.19            | 0.08  | 0.06 | 0.13            | 0.01  | 0.05 | 0.96               | -0.08 | 0.05 | 0.75 |
|                                                                | 30d/s                                                         | 83          | 0.02  | 0.07 | 0.84         | 0.16  | 0.10 | 0.22            | -0.12 | 0.09 | <b>0.02</b>     | -0.27 | 0.12 | <b>0.04</b>        | -0.11 | 0.08 | 0.71 |
| $\Delta$ Quadriceps relative peak torque (Nm/cm <sup>2</sup> ) |                                                               |             |       |      |              |       |      |                 |       |      |                 |       |      |                    |       |      |      |
| 180d/s                                                         | 83                                                            | -0.01       | 0.13  | 0.97 | -0.17        | 0.16  | 0.28 | 0.04            | 0.14  | 0.49 | 0.07            | 0.14  | 0.54 | -0.03              | 0.13  | 0.87 |      |
| 30d/s                                                          | 83                                                            | -0.03       | 0.05  | 0.78 | -0.05        | 0.06  | 0.63 | -0.06           | 0.06  | 0.32 | -0.09           | 0.06  | 0.36 | 0.04               | 0.05  | 0.86 |      |
| <b>Physical Function</b>                                       | $\Delta$ 400m walk time (s)                                   | 50          | -0.01 | 0.47 | 0.92         | -0.07 | 0.48 | 0.36            | 0.14  | 0.50 | 0.08            | 0.23  | 0.51 | 0.03               | 0.10  | 0.48 | 0.43 |
|                                                                | $\Delta$ 5 chair stand time (s)                               | 74          | -0.02 | 0.06 | 0.81         | 0.00  | 0.06 | 0.95            | -0.06 | 0.06 | 0.52            | -0.05 | 0.06 | 0.75               | -0.07 | 0.06 | 0.69 |

Multiple regression models were adjusted for age, ethnicity, height, ACCI, and total physical activity levels in the past two weeks. ALM: appendicular lean mass; BioT: bioavailable testosterone; CSA: cross-sectional area; E2: oestradiol; FEI: free oestradiol index; HU: Hounsfield unit; LLM: leg lean mass; SHBG: sex hormone-binding globulin; TT: total testosterone; T/E2: ratio of total testosterone to oestradiol.
